# Supplementary material
Source: publisher figshare collection journal article supplement (https://karger.figshare.com/ndownloader/files/26062607)
Supplement: Supplementary file 1 [file 26062607]

**Supplementary appendix**

Table S3. NOS scoring records for quality assessment

| **NOS scoring for included cohort studies** | | | | | | | | | | | | | |
| --- | --- | --- | --- | --- | --- | --- | --- | --- | --- | --- | --- | --- | --- |
| **Study, Year** | **Selection** | | | | | **Comparability** | **Outcome** | | | | | **Total scores** | **Quality Grade** |
| Representative-  ness of the exposed cohort | Selection of the non- exposed cohort | Ascertainment  of exposure | | Demonstration of outcome | Assessment of outcome | | Follow-up long enough for outcomes | Adequacy of follow-up of cohorts | |
| Andreassen, 2014 | 1 | 1 | 1 | | 0 | 2 | 1 | | 1 | 1 | | 8 | Good |
| Boixeda*,* 2014 | 1 | 1 | 1 | | 1 | 1 | 1 | | 1 | 1 | | 8 | Good |
| Grolimund*,* 2014 | 1 | 1 | 1 | | 1 | 0 | 1 | | 1 | 1 | | 7 | Poor |
| Huerta*,* 2013 | 1 | 1 | 1 | | 0 | 1 | 1 | | 1 | 1 | | 7 | Good |
| Husebø, 2018 | 1 | 1 | 1 | | 0 | 2 | 1 | | 1 | 1 | | 8 | Good |
| Jeong*,* 2010 | 1 | 1 | 1 | | 1 | 1 | 1 | | 1 | 1 | | 8 | Good |
| Kim*,* 2016 | 1 | 1 | 1 | | 0 | 1 | 1 | | 1 | 1 | | 7 | Good |
| Lieberman*,* 2002 | 1 | 1 | 1 | | 1 | 2 | 1 | | 1 | 1 | | 9 | Good |
| Lu*,* 2016 | 1 | 1 | 1 | | 0 | 2 | 1 | | 1 | 1 | | 8 | Good |
| Myint*,* 2011 | 1 | 1 | 1 | | 0 | 2 | 1 | | 1 | 1 | | 8 | Good |
| Pizzini*,* 2017 | 1 | 1 | 1 | | 1 | 2 | 1 | | 1 | 1 | | 9 | Good |
| Saleh*,* 2015 | 1 | 1 | 1 | | 0 | 2 | 1 | | 1 | 1 | | 8 | Good |
| Sharafkhane*,* 2017 | 1 | 1 | 1 | | 0 | 0 | 1 | | 1 | 1 | | 6 | Poor |
| Shin*,* 2016 | 1 | 1 | 1 | | 0 | 1 | 1 | | 1 | 1 | | 7 | Good |
| Shin*,* 2019 | 1 | 1 | 1 | | 1 | 2 | 1 | | 1 | 1 | | 9 | Good |
| Søgaard*,* 2016 | 1 | 1 | 1 | | 1 | 1 | 1 | | 1 | 1 | | 8 | Good |
| Steer*,* 2012 | 1 | 1 | 1 | | 1 | 0 | 1 | | 1 | 1 | | 7 | Poor |
| **NOS scoring for included case-control study** | | | | | | | | | | | | | |
| **Study, Year** | **Selection** | | | | | **Comparability** | **Exposure** | | | | | **Total score** | **Quality Grade** |
| Cases definition | Cases representativeness | | Controls selection | Outcome of mortality | Assessment of exposure | Same method to determine  exposure | | | No response rate |
| Yu, 2018 | 1 | 1 | | 1 | 1 | 0 | 1 | 1 | | | 1 | 7 | Poor |

NOS, Newcastle-Ottawa Scale.
